# Supplementary material for: Do we need to change our perspective about gut biomarkers? A public data mining approach to identify differentially abundant bacteria in intestinal inflammatory diseases
Source: Front Cell Infect Microbiol. 2022 Nov 21;12:918237. doi: 10.3389/fcimb.2022.918237 (PMC9719923; doi:10.3389/fcimb.2022.918237)
Supplement: Supplementary file 3 [file Table_2.xlsx]

## Sheet: CRC
Authors	Title	Year	Disease	Study Accesion Number	Repository	Sample type	Sequencing plataform	16s region	Primers	Number of samples included	Additional observations
Clos-Garcia, M., Garcia, K., Alonso, C., et al.	Integrative Analysis of Fecal Metagenomics and Metabolomics in Colorectal Cancer	2020	Colorectal cancer	PRJEB33634	European Nucleotide Archive (ENA)	Stool	Illumina	V1-V2	27F/338R	86 CRC subjects and 73 HC
Lu, Y., Chen, J., Zheng, J., et al.	Mucosal adherent bacterial dysbiosis in patients with colorectal adenomas	2016	Colorectal cancer	SRP064975	GenBank Sequence Read Archive	Biopsy	454/Illumina	V3-V4	338F/806R	31 CRC subjects and 20 HC
Du, X., Li, Q., Tang, Z., et al.	Alterations of the Gut Microbiome and Fecal Metabolome in Colorectal Cancer: Implication of Intestinal Metabolism for Tumorigenesis	2022	Colorectal cancer	PRJNA824020	European Nucleotide Archive (ENA)	Stool	Illumina	V4	515F/806R	27 CRC subjects and 33 CH
Konishi, Y., Okumura, S., Matsumoto, T., et al.	Development and evaluation of a colorectal cancer screening method using machine learning-based gut microbiota analysis	2022	Colorectal cancer	DRA011735	DNA Data Bank of Japan (DDBJ)	Stool	Illumina	V1-V2	16S-27F/16S-338R	220 CRC subjects and 234 HC	We only included samples belonging to cohort 1 due to the large sample size of the study. Cohort 1 was selected as it comprised the majority of subjects belonging to CRC subjects and their controls and excluded those classified as advanced-stage carcinoma.
Uchino, Y., Goto, Y., Konishi, Y., et al.	Colorectal Cancer Patients Have Four Specific Bacterial Species in Oral and Gut Microbiota in Common-A Metagenomic Comparison with Healthy Subjects	2021	Colorectal cancer	DRA012322	DNA Data Bank of Japan (DDBJ)	Stool	Illumina	V1-V2	16S-27Fmod/16S-338R	52 CRC subjects and 51 HC

## Sheet: CD
Authors	Title	Year	Disease	Study Accesion Number	Repository	Sample type	Sequencing plataform	16s region	Primers	Number of samples included	Additional observations
Alam, M. T., Amos, G. C., Murphy, A. R., et al	Microbial imbalance in inflammatory bowel disease patients at different taxonomic levels	2020	CD/UC	PRJEB33711	European Nucleotide Archive (ENA)	Stool	454	Not specified	27F/534R	10 CD subjects and 9 HC
Braun, T., Di Segni, A., BenShoshan, M., et al.	Individualized Dynamics in the Gut Microbiota Precede Crohn's Disease Flares	2019	CD	PRJNA450540	European Nucleotide Archive (ENA)	Stool	Illumina	V4	515F/806R	62 CD subjects and 22 HC
Forbes, J. D., Chen, C. Y., Knox, N. C., et al.	A comparative study of the gut microbiota in immune-mediated inflammatory diseases-does a common dysbiosis exist?	2018	CD/UC	PRJNA450340	European Nucleotide Archive (ENA)	Stool	Illumina	V4	515fXT/806rXT	18 CD subjects and 23 HC
Weng, Y. J., Gan, H. Y., Li, X., et al.	Correlation of diet, microbiota and metabolite networks in inflammatory bowel disease	2019	CD/UC	PRJNA431126	Sequence Read Archive (SRA)	Stool/biopsy	Illumina	V4	Not specified	58 CD subjects and 24 HC
Zhou, Y., Xu, Z. Z., He, Y., et al.	Gut Microbiota Offers Universal Biomarkers across Ethnicity in Inflammatory Bowel Disease Diagnosis and Infliximab Response Prediction	2018	CD/UC	PRJEB22028	European Nucleotide Archive (ENA)	Stool	Illumina	V4	515F/806R	66 CD subjects and 16 HC
Lloyd-Price, J., Arze, C., Ananthakrishnan, A. N., et al	Multi-omics of the gut microbial ecosystem in inflammatory bowel diseases	2019	CD/UC	PRJNA398089	European Nucleotide Archive (ENA)	Biopsy	Illumina	V4	515F/806R	25 CD subjects and 10 HC	We only included samples belonging to patients from Massachusetts General Hospital and Cedars-Sinai Medical Center, as they were the medical centers that sampled adults. Further, we considered biopsy samples because stool samples did not comprise all the study groups (controls and cases). Finally, the samples considered corresponded to the first colonoscopy (week 0) performed on the subjects.
Pisani, A., Rausch, P., Bang, C., et al.	Dysbiosis in the Gut Microbiota in Patients with Inflammatory Bowel Disease during Remission	2022	CD/UC	PRJEB44440 /PRJEB47162(control)	European Nucleotide Archive (ENA)	Stool	Illumina	V1-V2	27F/338R	32 CD subjects and 96 HC
Bourgonje, A. R., Roo-Brand, G., Lisotto, P., et al.	Patients With Inflammatory Bowel Disease Show IgG Immune Responses Towards Specific Intestinal Bacterial Genera	2022	CD/UC	PRJNA816096	European Nucleotide Archive (ENA)	Stool	Illumina	V3-V4	341F/806R	27 CD subjects and 94 HC

## Sheet: UC
Authors	Title	Year	Disease	Study Accesion Number	Repository	Sample type	Sequencing plataform	16s region	Primers	Number of samples included	Additional observations
Alam, M. T., Amos, G. C., Murphy, A. R., Murch, S., Wellington, E. M., & Arasaradnam, R. P.	Microbial imbalance in inflammatory bowel disease patients at different taxonomic levels	2020	CD/UC	PRJEB33711	ENA	Stool	454	Not specified	27F/534R	11 UC subjects and 9 HC
Bajer, L., Kverka, M., Kostovcik, M., Macinga, P., Dvorak, J., Stehlikova, Z., ... & Drastich, P.	Distinct gut microbiota profiles in patients with primary sclerosing cholangitis and ulcerative colitis	2017	UC	PRJNA368966	Short Read Archive	Stool	Illumina	V3-V4	341F/806R	32 UC subjects and 32 HC
Forbes, J. D., Chen, C. Y., Knox, N. C., Marrie, R. A., El-Gabalawy, H., de Kievit, T. & Van Domselaar, G.	A comparative study of the gut microbiota in immune-mediated inflammatory diseases-does a common dysbiosis exist?	2018	CD/UC	PRJNA450340	ENA	Stool	Illumina	V4	515fXT/806rXT	19 UC subjects and 23 HC
Quraishi, M. N., Acharjee, A., Beggs, A. D., Horniblow, R., Tselepis, C., Gkoutos, G., ... & Iqbal, T. H.	A pilot integrative analysis of colonic gene expression, gut microbiota, and immune infiltration in primary sclerosing cholangitis-inflammatory bowel disease: association of disease with bile acid pathways	2020	UC	PRJNA533720	SRA	Biopsy	Illumina	V4	515F/806R	10 UC subjects and 10 HC
Weng, Y. J., Gan, H. Y., Li, X., Huang, Y., Li, Z. C., Deng, H. M. & Zhi, F. C.	Correlation of diet, microbiota and metabolite networks in inflammatory bowel disease	2019	CD/UC	PRJNA431126	SRA	Stool/biopsy	Illumina	V4	Not specified	31 UC subjects and 24 HC
Zhou, Y., Xu, Z. Z., He, Y., Yang, Y., Liu, L., Lin, Q., ... & Chen, Y.	Gut Microbiota Offers Universal Biomarkers across Ethnicity in Inflammatory Bowel Disease Diagnosis and Infliximab Response Prediction	2018	CD/UC	PRJEB22028	ENA	Stool	Illumina	V4	515F/806R	45 UC subjects and 16 HC
Lloyd-Price, J., Arze, C., Ananthakrishnan, A. N., et al	Multi-omics of the gut microbial ecosystem in inflammatory bowel diseases	2019	CD/UC	PRJNA398089	European Nucleotide Archive (ENA)	Biopsy	Illumina	V4	515F/806R	18 UC subjects and 10 HC	We only included samples belonging to patients from Massachusetts General Hospital and Cedars-Sinai Medical Center, as they were the medical centers that sampled adults. Further, we considered biopsy samples because stool samples did not comprise all the study groups (controls and cases). Finally, the samples considered corresponded to the first colonoscopy (week 0) performed on the subjects.
Pisani, A., Rausch, P., Bang, C., et al.	Dysbiosis in the Gut Microbiota in Patients with Inflammatory Bowel Disease during Remission	2022	CD/UC	PRJEB44440 /PRJEB47162(control)	ENA	Stool	Illumina	V1-V2	27F/338R	66 UC subjects and 96 HC
Bourgonje, A. R., Roo-Brand, G., Lisotto, P., et al.	Patients With Inflammatory Bowel Disease Show IgG Immune Responses Towards Specific Intestinal Bacterial Genera	2022	CD/UC	PRJNA816096	ENA	Stool	Illumina	V3-V4	341F/806R	84 UC subjects and 94 HC

## Sheet: IBS
Authors	Title	Year	Disease	Study Accesion Number	Repository	Sample type	Sequencing plataform	16s region	Primers	Number of samples included	Additional observations
Rogers, A. E., Hu, Y. J., Yue, Y., Wissel, E. F., Petit III, R. A., Jarrett, S., ... & Read, T. D	Shiftwork, functional bowel symptoms, and the microbiome	2021	IBS	PRJNA687007	Sequence Read Archive (SRA)	Stool	Illumina	V3-V4	Not specified	18 IBS subjects and 33 HC
Wang, B., Zhu, S., Liu, Z., Wei, H., Zhang, L., He, M., ... & Duan, L.	Increased Expression of Colonic Mucosal Melatonin in Patients with Irritable Bowel Syndrome Correlated with Gut Dysbiosis	2020	IBS	CRA001604	GSA database	Stool	Illumina	V3-V4	338F/806R	22 IBS subjects and 18 HC
Zhu, S., Liu, S., Li, H., Zhang, Z., Zhang, Q., Chen, L., ... & Zhang, S.	Identification of Gut Microbiota and Metabolites Signature in Patients With Irritable Bowel Syndrome	2019	IBS	PRJNA566284	Sequence Read Archive (SRA)	Stool	Illumina	V4	U515/E786	15 IBS subjects and 14 HC
Zhuang, X., Tian, Z., Li, L., Zeng, Z., Chen, M., & Xiong, L.	Fecal Microbiota Alterations Associated With Diarrhea-Predominant Irritable Bowel Syndrome	2018	IBS	SRP150089	Sequence Read Archive (SRA)	Stool	Illumina	V3-V4	338F/806R	20 IBS subjects and 10 HC

## Sheet: CDI
Authors	Title	Year	Disease	Study Accesion Number	Repository	Sample type	Sequencing plataform	16s region	Primers	Number of samples included	Additional observations
Duan, J., Meng, X., Liu, S., et al.	Gut Microbiota Composition Associated With Clostridium difficile-Positive Diarrhea and C. difficile Type in ICU Patients	2020	CDI	PRJNA597086	Sequence Read Archive (SRA)	Stool	Illumina	V4	515F/806R	58 CDI subjects and 21 HC
